# Supplementary material for: Rapid screening by MALDI-TOF mass spectrometry to probe binding specificity at enzyme active sitesElectronic supplementary information (ESI) available: details of suppliers of chemicals used in MALDI-TOF mass spectrometry screening assay. See http://www.rsc.org/suppdata/cc/b3/b308182f/
Source: Royal Society of Chemistry journal article supplement (doi:10.1039/b308182f), 2003-01-01
Supplement: b308182f.pdf [file b308182f.pdf]

### Suppliers of chemicals used in MALDI-TOF mass spectrometry screening assay.

All commercial compounds shown in Scheme 2 were supplied by Sigma-Aldrich with the following exceptions: methyl L-aspartate (**10**) was supplied by BACHEM; D-glutamate (**11**) by Koch-Light Laboratories (now NBS Biologicals); L-isoleucine, L-phenylalanine, L-threonine, L-valine and L-leucine by Fluka and D-leucine by Lancaster.

Additional compounds used in the assay not shown in Scheme 2 were supplied by Sigma-Aldrich (L-ornithine, 5-aminopentanoate, *meso*-diaminosuccinate,  $\beta$ -chloroalanine, 1,2-diaminopropane, 1,2-diamino-2-methylpropane, tris(hydroxymethyl)methylamine, glycine methyl ester and 3-aminobenzoic acid); Fluka (L-phenylalanine) and Affinity Sensors, Cambridge, UK (ethanolamine)

R-2-aminomethylsuccinate (**16**) was a gift from L.M. Birch, R-2-hydrazinosuccinate (**19**) was a gift from T.M. Murray-Rust, L- $\alpha$ -(1-fluorovinyl)-aspartate (**20**) was a gift from D.B. Berkowitz and R. de la Salud-Bea.
